# Supplementary material for: A substrate surface alloy strategy for integrated sulfide electrodes for sodium ion batteries with superior lifespan
Source: Royal Society of Chemistry journal article supplement (doi:10.1039/d1ma00363a), 2021-01-01
Supplement: d1ma00363a1.pdf [file d1ma00363a1.pdf]

# Substrate Surface Alloy Strategy for Integrated Sulfide Electrode for Sodium Ion Batteries with Superior Lifespan

Li-Feng Zhou,<sup>a</sup> Tao Du,<sup>a\*</sup> Li-Ying Liu,<sup>a</sup> Yi-Song Wang,<sup>a</sup> and Wen-Bin Luo<sup>\*a, b</sup>

<sup>a</sup> Section of Environmental Protection Key Laboratory of Eco-Industry, Northeastern University, Shenyang 110004, China

<sup>b</sup> Institute for Energy Electrochemistry and Urban Mines Metallurgy, School of Metallurgy Northeastern University, Shenyang, China

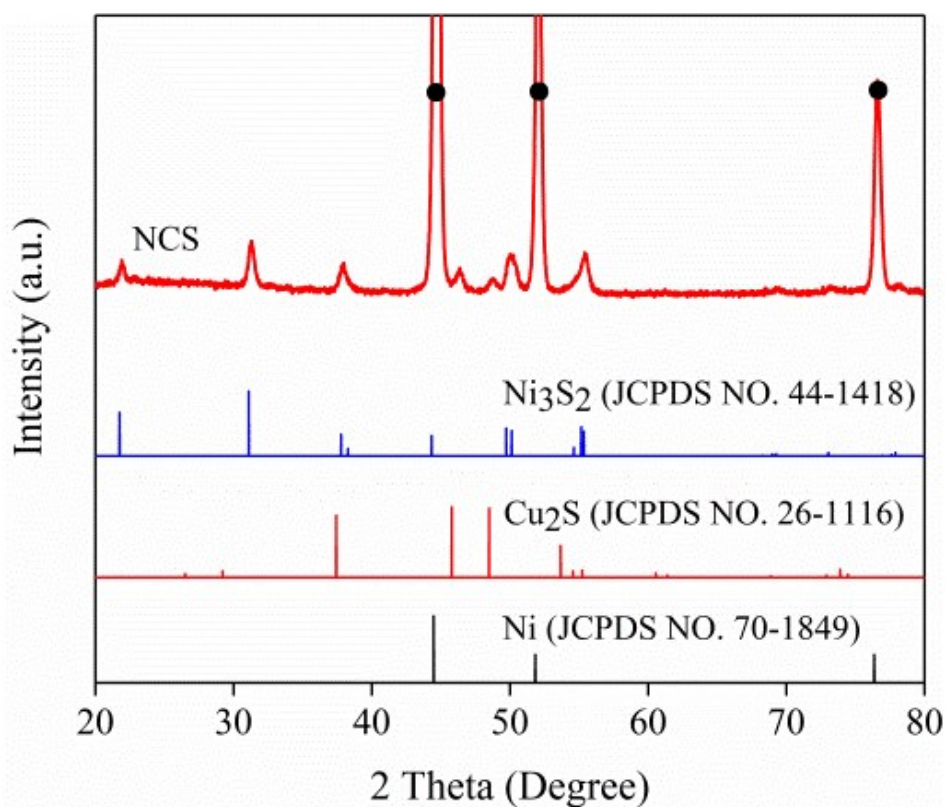

Figure S1. XRD pattern of NCS on Ni foam

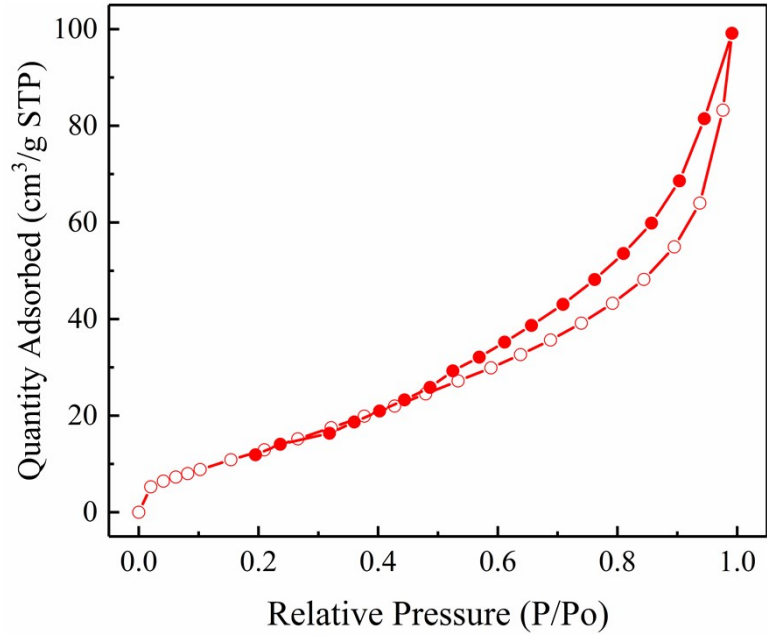

Figure S2. Nitrogen adsorption-desorption isotherm measurement

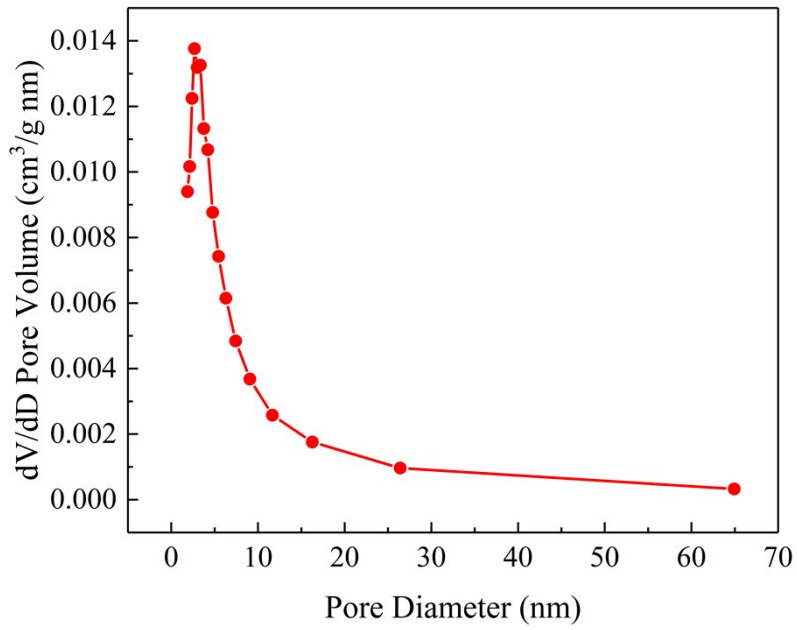

Figure S3. Pore diameter and pore volume distribution

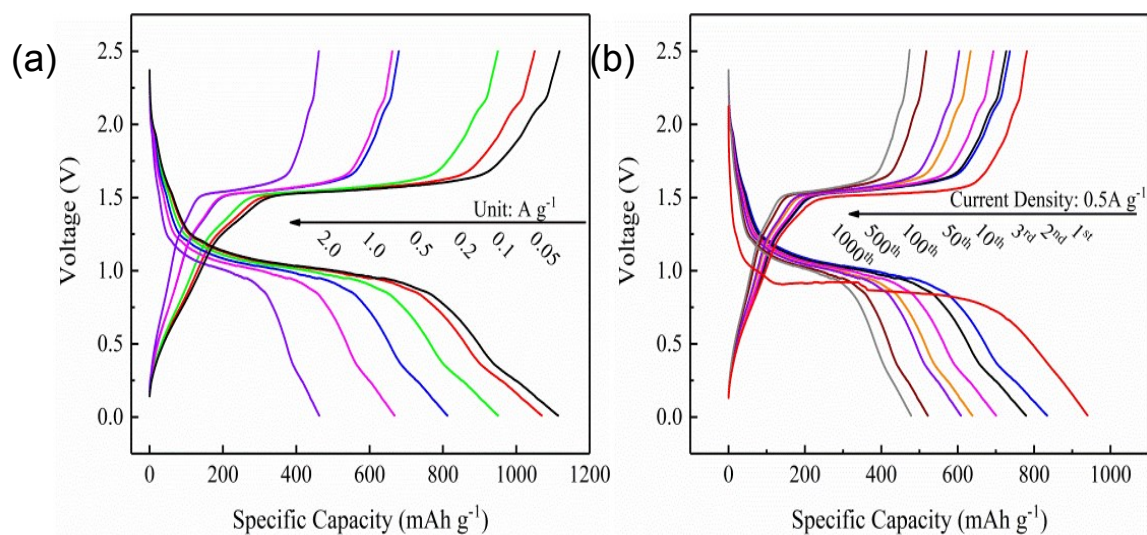

**Figure S4.** (a) The charge and discharge curves under different current density (0.05-2.0 A g<sup>-1</sup>); (b) The charge and discharge curves under different cycles.

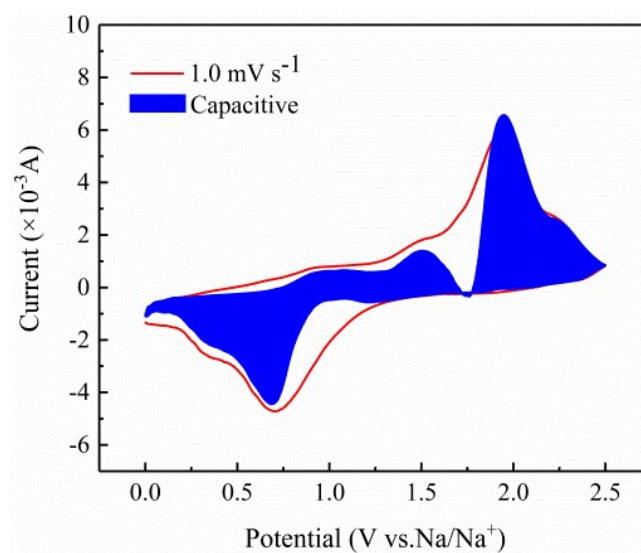

**Figure S5.** The CV curve at a scan rate of 1 mV s<sup>-1</sup> with the capacitive contribution to the total current shown by the shaded region.

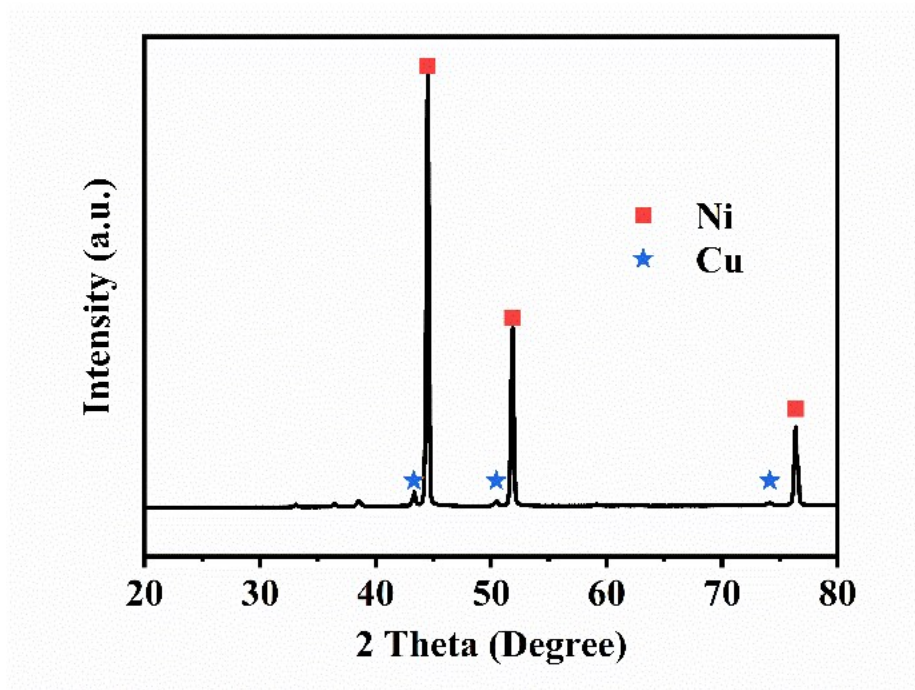

Figure S6 XRD curves of Ni-Cu alloy.

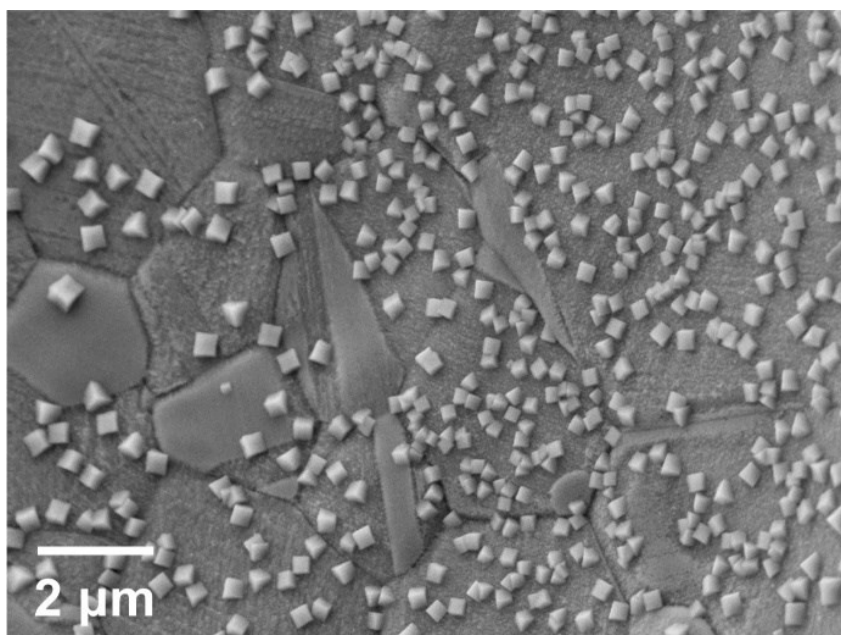

Figure S7 SEM images of Ni-Cu alloy.



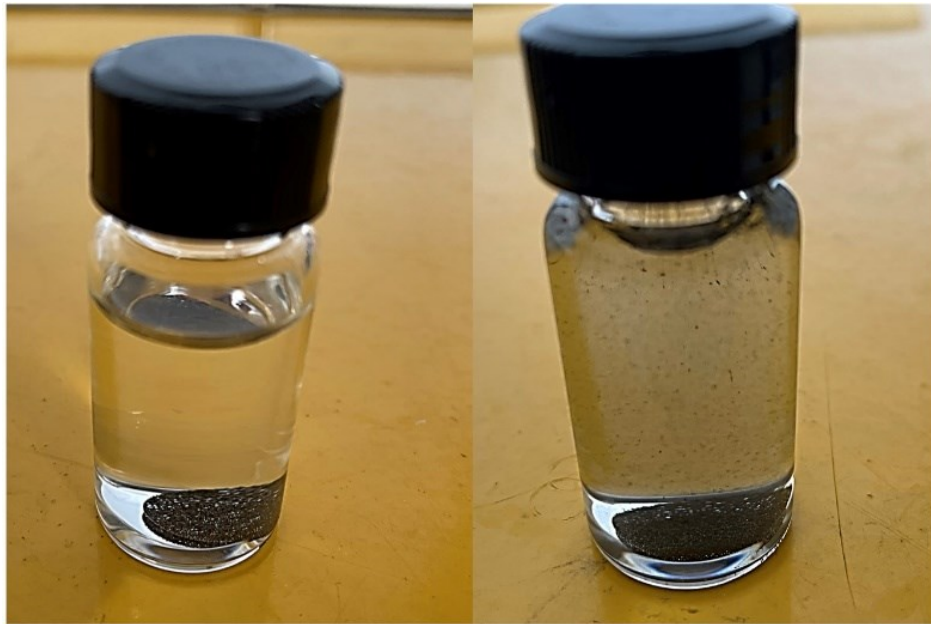

Figure S8 Immersion experiment in ultrasonic environment. (a) NCS on the surface of NiCu alloy. (b) NCS on the surface of Ni foam.

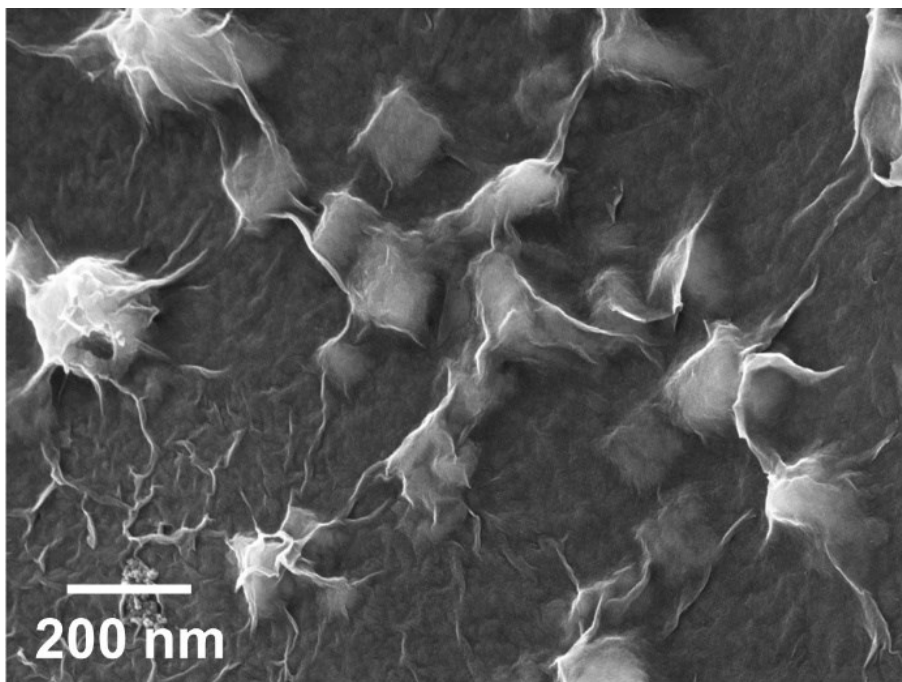

Figure S9 The SEM image of crystal growth on the surface of NiCu alloy.

**Table. S1** Comparison of the electrochemical performance of the metal sulfide SIB anodes reported in the literatures.

| Materials                                                               | Current density (A g <sup>-1</sup> ) | Initial charge capacity (mAh g <sup>-1</sup> ) | Cycle number | Capacity retention (%) | Ref.      |
|-------------------------------------------------------------------------|--------------------------------------|------------------------------------------------|--------------|------------------------|-----------|
| CuS-RGO                                                                 | 1                                    | ~360                                           | 450          | 96.03                  | 1         |
| Cu <sub>2</sub> S                                                       | ~0.5                                 | ~400                                           | 450          | >100                   | 2         |
| CuSbS <sub>2</sub>                                                      | 0.2                                  | 730                                            | 20           | 64.38                  | 3         |
| NiS <sub>2</sub> Nanospheres                                            | 0.5                                  | ~720                                           | 1000         | 44.31                  | 4         |
| (Ni <sub>0.3</sub> Co <sub>0.7</sub> ) <sub>9</sub> S <sub>8</sub> /RGO | 1                                    | ~570                                           | 400          | 44.56                  | 5         |
| NiS <sub>2</sub> -GNS                                                   | ~0.08                                | 528                                            | 200          | 77                     | 6         |
| NCS                                                                     | 0.5                                  | 782                                            | 1000         | 61.28                  | This work |

#### Reference

1. J. Li, D. Yan, T. Lu, W. Qin, Y. Yao and L. Pan, *ACS Applied Materials & Interfaces*, 2017, **9**, 2309–2316.
2. M. G. Boebinger, M. Xu, X. Ma, H. Chen, R. R. Unocic and M. T. McDowell, *J. Mater. Chem. A*, 2017, **5**, 11701–11709.
3. C. Marino, T. Block, R. Pöttgen and C. Villevieille, *Journal of Power Sources*, 2017, **342**, 616–622.
4. R. Sun, S. Liu, Q. Wei, J. Sheng, S. Zhu, Q. An and L. Mai, *Small*, 2017, **13**, 1701744.
5. J. Lv, D. Bai, L. Yang, Y. Guo, H. Yan and S. Xu, *Chemical Communications*, 2018, **54**, 8909–8912.
6. T. Wang, P. Hu, C. Zhang, H. Du, Z. Zhang, X. Wang, S. Chen, J. Xiong and G. Cui, *ACS Applied Materials & Interfaces*, 2016, **8**, 7811–7817.
